# Supplementary material for: Tropospheric chemical degradation of vinyl and allyl acetate initiated by Cl atoms under high and low NOxconditions
Source: Royal Society of Chemistry journal article supplement (doi:10.1039/c5ra04975j), 2015-01-01
Supplement: c5ra04975j1.pdf [file c5ra04975j1.pdf]

## Supplementary Information

for

### Tropospheric chemical degradation of vinyl and allyl acetate initiated by Cl atoms under high and low NO<sub>x</sub> conditions

María B. Blanco<sup>a</sup>, Iustinian Bejan<sup>b,c</sup>, Ian Barnes<sup>b\*</sup>, Peter Wiesen<sup>b</sup> and Mariano A. Teruel<sup>a\*</sup>

<sup>a</sup>Instituto de Investigaciones en Fisicoquímica de Córdoba (I.N.F.I.Q.C.), Dpto. de Fisicoquímica, Facultad de Ciencias Químicas, Universidad Nacional de Córdoba. Ciudad Universitaria, 5000 Córdoba, Argentina.

<sup>b</sup>Physikalische Chemie/FBC, Bergische Universitaet Wuppertal, Wuppertal, Germany.

<sup>c</sup>“Al. I. Cuza” University of Iasi, Faculty of Inorganic and Analytical Chemistry, Iasi, Romania.

Corresponding authors:

barnes@uni-wuppertal.de (Phone: +49 202 439 2510, Fax: +49 202 439 2505),

mteruel@fcq.unc.edu.ar (Phone: +54 351 4334169/80 int 221, Fax: +54 351 4334188)

#### Content Summary

Concentration-time profiles in the presence and absence of NO<sub>x</sub> for the reaction of Cl with VA, Figures S1 and S4, respectively and for the reaction Cl with AA in the presence of NO<sub>x</sub>, Figure S6.

Yield plots for the products formed from the reaction of Cl with VA in the presence of NO<sub>x</sub> (Figure S2) and for the reaction of Cl with AA in the presence of NO<sub>x</sub> (Figure S7). IR spectra plots used in the identification of the products formed in the reaction of Cl with VA in the absence of NO<sub>x</sub> (Figure S3), AA in the presence of NO<sub>x</sub> (Figure S5) and AA in the absence of NO<sub>x</sub> (Figure S8). A list of the concentrations, infrared absorption frequencies and chemicals used with purities is given.

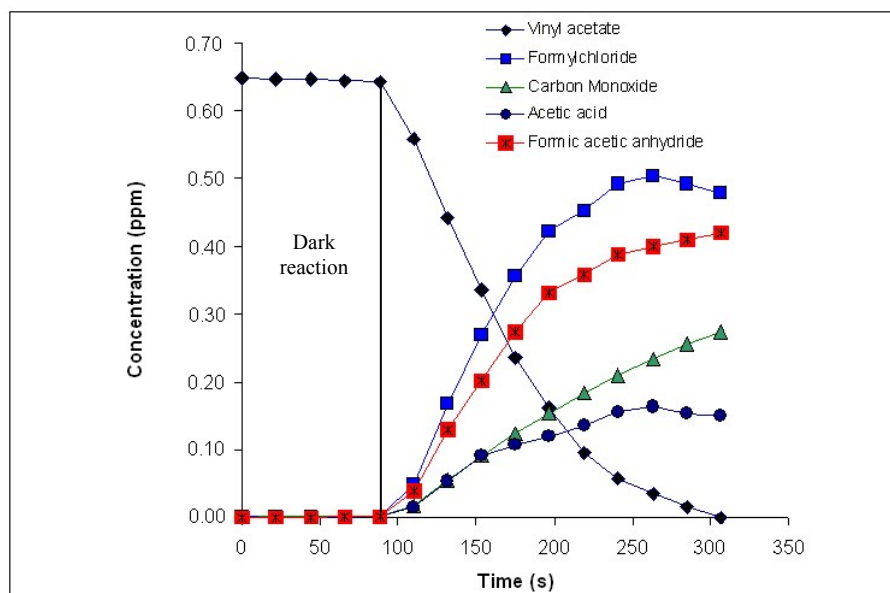

**Figure S1:** Concentration-time profiles of vinyl acetate (VA) and the reaction products formyl chloride, carbon monoxide acetic acid and formic acetic anhydride obtained from the irradiation of a VA/Cl<sub>2</sub>/NO/air reaction mixture.

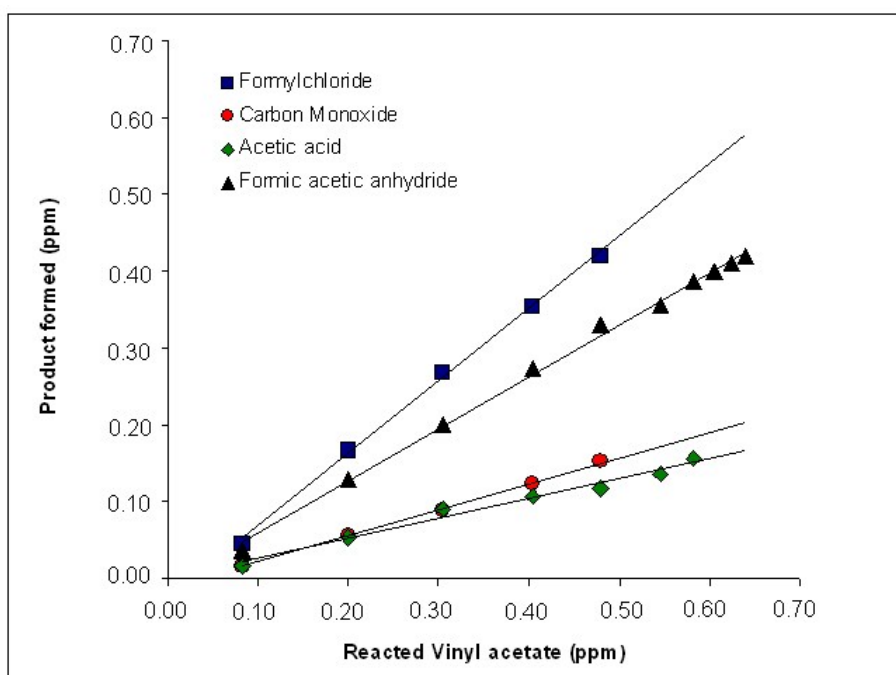

**Figure S2:** Plots of the concentrations of the reaction products formyl chloride, carbon monoxide, acetic acid and formic acetic anhydride as a function of reacted vinyl acetate obtained from the irradiation of a VA/Cl<sub>2</sub>/NO/air reaction mixture.

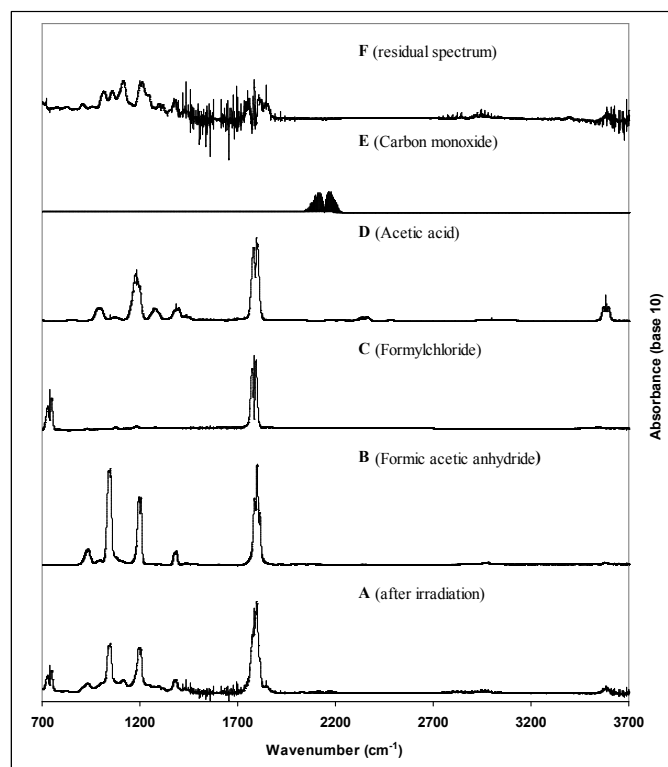

**Figure S3:** Panel A shows the infrared spectrum of VA/Cl<sub>2</sub>/air reaction mixture after irradiation and subtraction of residual vinyl acetate. Panels B, C, D and E show reference spectra of formic acetic anhydride, formyl chloride, acetic acid and carbon monoxide, respectively. Panel F shows the residual product spectrum obtained after subtraction of features due to the identified products (panels B, C, D, E) from the spectrum in panel A.

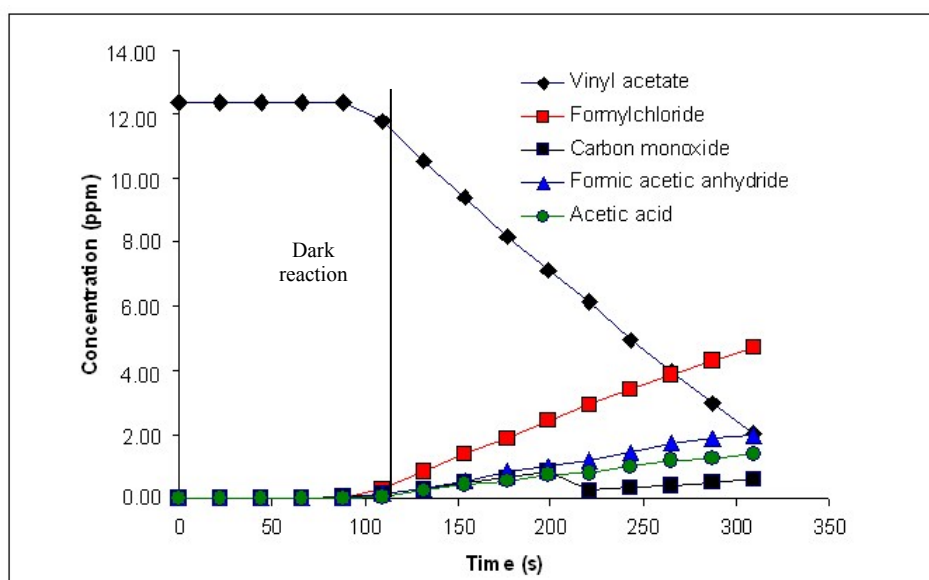

**Figure S4:** Concentration-time profiles of vinyl acetate (VA) and the reaction products formyl chloride, carbon monoxide acetic acid and formic acetic anhydride obtained from the irradiation of a VA/Cl<sub>2</sub>/air reaction mixture.

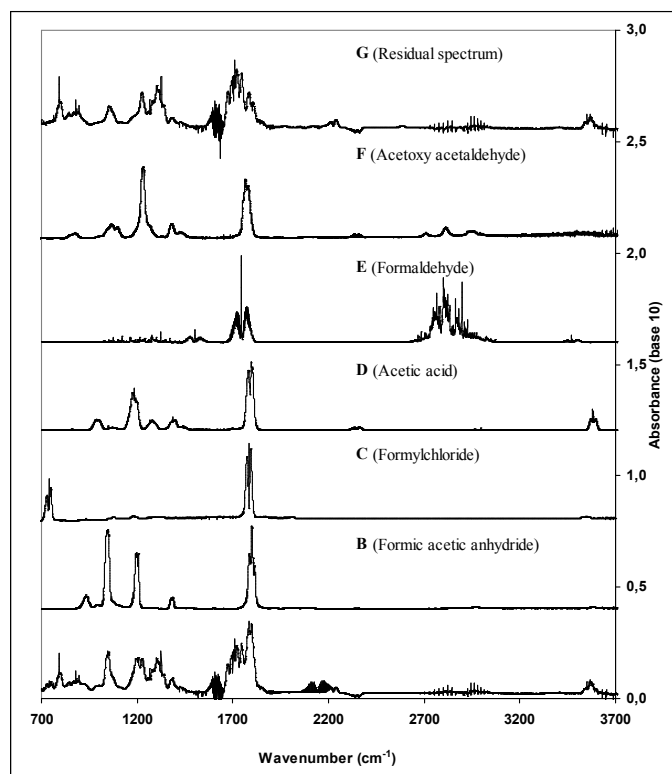

**Figure S5:** Panel A shows the infrared spectrum of a AA/Cl<sub>2</sub>/NO/air reaction mixture after irradiation and subtraction of residual allyl acetate. Panels B, C, D, and F show a reference spectrum of formic acetic anhydride, formyl chloride, acetic acid, formaldehyde and acetoxyacetaldehyde, respectively. Panel G shows the residual product spectrum obtained after subtraction of features due to the identified products (panels B, C, D, E, F) from the spectrum in panel A.

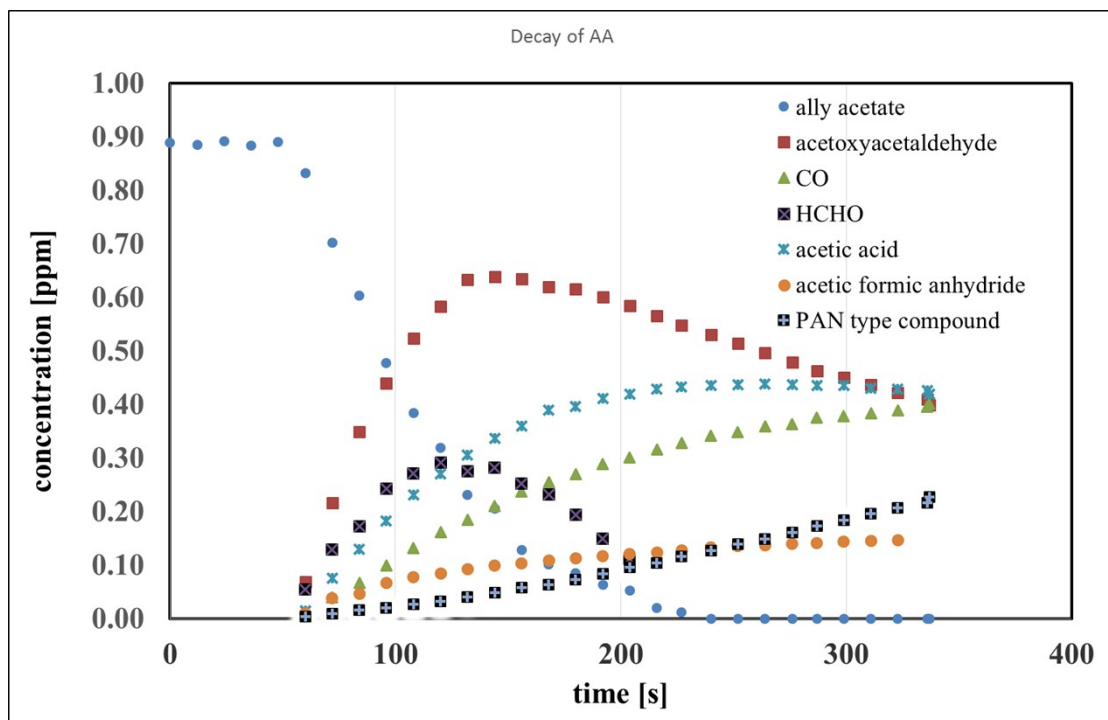

**Figure S6:** Concentration-time profiles of allyl acetate (AA) and the observed products acetoxyacetaldehyde, acetic acid, formic acetic anhydride, formaldehyde and CO obtained from the irradiation of a AA/Cl<sub>2</sub>/NO/air reaction mixture. The observed PAN-type compound (CH<sub>3</sub>C(O)OCH<sub>2</sub>C(O)OONO<sub>2</sub>) is plotted as function of the absorbance at 952 cm<sup>-1</sup> versus time since a calibrated spectrum is not available.

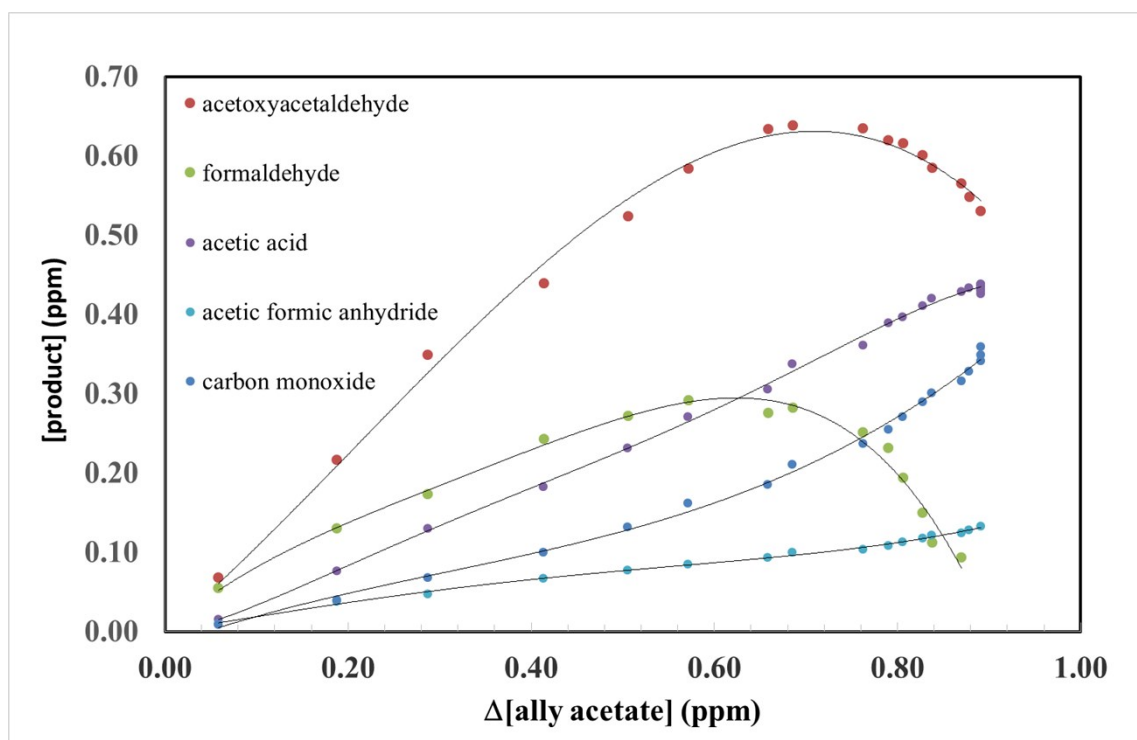

**Figure S7:** Plot of the concentrations of the products formed in the reaction of Cl with allyl acetate (AA) in the presence of NO as a function of the amount of reacted VA.

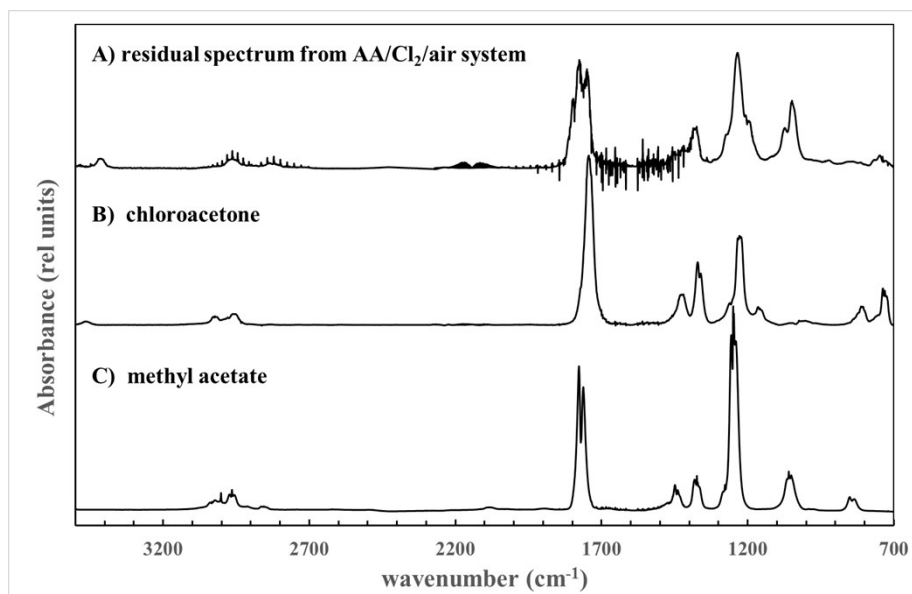

**Figure S8:** Panel A shows the infrared spectrum of AA/Cl<sub>2</sub>/air reaction mixture after irradiation and subtraction of residual allyl acetate and minor contributions from products listed in figure caption S7. Panel B shows a reference spectrum of chloroacetone and panel C a reference spectrum of methyl acetate.

### Concentrations, infrared absorption frequencies and chemicals used

The initial concentrations used in the experiments in ppmV (1 ppmV =  $2.46 \times 10^{13}$  molecule cm<sup>-3</sup> at 298 K and 760 Torr of total pressure) were: 0.52 – 0.81 for VA and 0.39 – 0.84 for AA. The concentration of Cl<sub>2</sub> was typically between 4 to 12 ppm which resulted in Cl atom concentrations of typically  $5\text{--}10 \times 10^7$  atoms cm<sup>-3</sup>. The concentration of NO was typically around 6 ppm.

The following infrared absorption frequencies (in cm<sup>-1</sup>) were used to monitor the reactants: VA at 1148.6 and AA at 3098.4. Products were monitored at the following absorption frequencies (in cm<sup>-1</sup>): formaldehyde at 2766; formic acetic anhydride at 1041.4; acetic acid at 1184 and acetoxycetaldehyde at 1230.

The chemicals used in the experiments had the following purities as given by the manufacturer and were used as supplied: synthetic air (Air Liquide, 99.999%), VA (Aldrich, 99%), AA (Aldrich, 99%), Cl<sub>2</sub> (Messer Griesheim, 2.8) and NO (Messer Griesheim, 99 %).

The absorption cross sections (base 10) for a particular wavelength used in the quantification of the reactants and products were: vinyl acetate:  $9 \times 10^{-4}$  ppm<sup>-1</sup> m<sup>-1</sup> (2169 cm<sup>-1</sup>); allyl acetate:  $8 \times 10^{-5}$  ppm<sup>-1</sup> m<sup>-1</sup> (931 cm<sup>-1</sup>); formic acetic anhydride:  $9.6 \times 10^{-19}$  molecule<sup>-1</sup> cm<sup>2</sup> (1041 cm<sup>-1</sup>); acetic acid:  $5.65 \times 10^{-4}$  ppm<sup>-1</sup> m<sup>-1</sup> (1184 cm<sup>-1</sup>); formyl chloride:  $66 \times 10^{-20}$  molecule<sup>-1</sup> cm<sup>2</sup> (738 cm<sup>-1</sup>); formaldehyde:  $3.1 \times 10^{-4}$  ppm<sup>-1</sup> m<sup>-1</sup> (2766 cm<sup>-1</sup>); carbon monoxide:  $4 \times 10^{-4}$  ppm<sup>-1</sup> m<sup>-1</sup> (2169 cm<sup>-1</sup>); acetoxycetaldehyde:  $2.14 \times 10^{-20}$  molecule<sup>-1</sup> cm<sup>2</sup> (1230 cm<sup>-1</sup>).
